# Supplementary material
Source: publisher figshare collection journal article supplement (https://diabetesjournals.figshare.com/articles/dataset/_/22289512)

**Supplemental Figure 1.** A1C by technology group, adjusted for age, diabetes duration, gender, insurance, and race/ethnicity; patients who remained in same technology group. P values are indicated by \* < 0.05, \*\* < 0.01, \*\*\* < 0.001, \*\*\*\* < 0.0001. Error bars represent 95% confidence intervals.

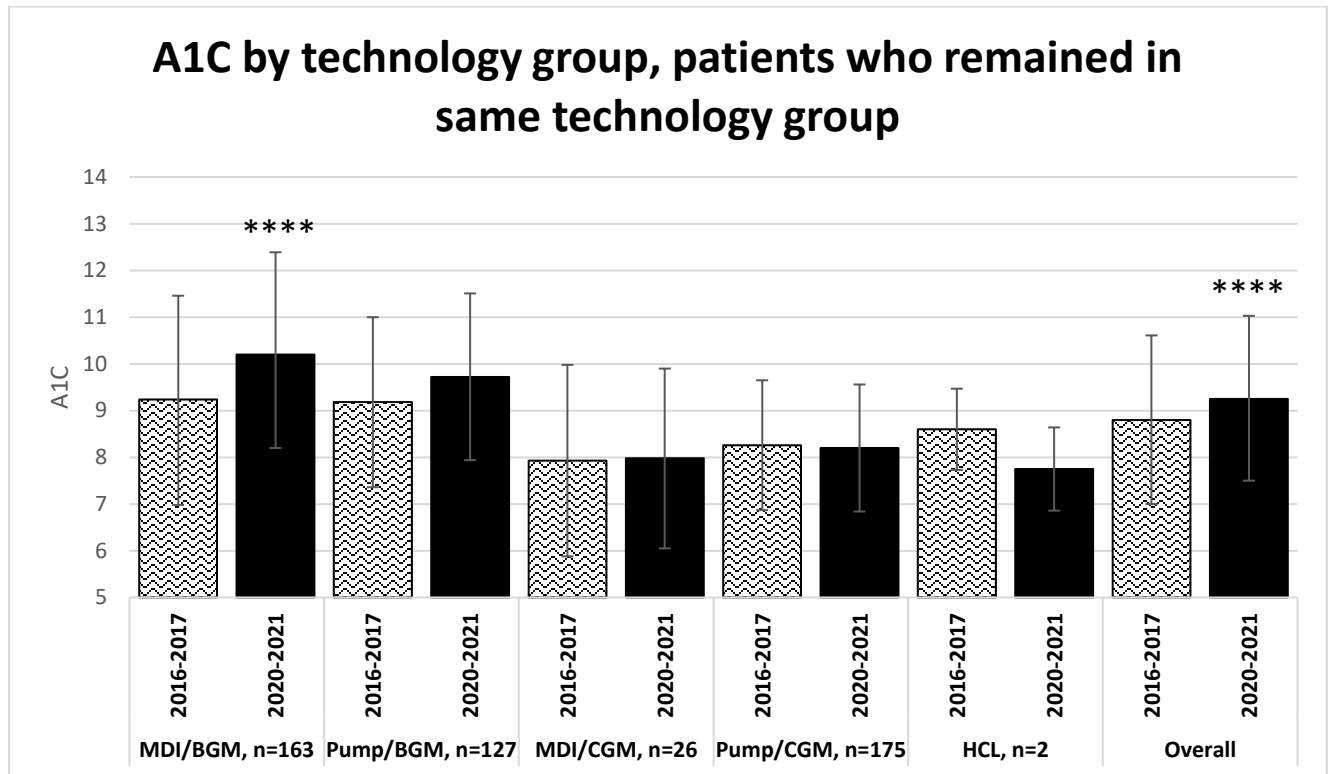

Supplement: Supplementary file 1 [file 1]
