# Supplementary material
Source: publisher figshare collection journal article supplement (https://diabetesjournals.figshare.com/articles/dataset/_/22289512)
Supplement: Supplementary file 2 [file 1]

**Supplemental Table.** Demographic characteristics across technology use groups. Cohort of patients who had data in both time periods. Mean [SD], Least Squares Mean {SE}, or n (%)

|                            | MDI/BGM            |                    | Pump/BGM           |                    | MDI/CGM           |                    | Pump/CGM           |                    | HCL              |                    | Overall             |                     |
|----------------------------|--------------------|--------------------|--------------------|--------------------|-------------------|--------------------|--------------------|--------------------|------------------|--------------------|---------------------|---------------------|
|                            | 2016-2017<br>N=416 | 2020-2021<br>N=204 | 2016-2017<br>N=474 | 2020-2021<br>N=199 | 2016-2017<br>N=91 | 2020-2021<br>N=165 | 2016-2017<br>N=471 | 2020-2021<br>N=421 | 2016-2017<br>N=3 | 2020-2021<br>N=466 | 2016-2017<br>N=1455 | 2020-2021<br>N=1455 |
| Age in years               | 12.5 [3.9]         | 117.2 [3.6]        | 13.2 [3.5]         | 17.6 [3.4]         | 11.0 [4.0]        | 17.1 [3.9]         | 11.5 [4.0]         | 15.7 [4.1]         | 15.9 [0.43]      | 15.6 [3.7]         | 12.3 [3.9]          | 16.3 [3.9]          |
| A1C* %                     | 9.1 [2.0]          | 10.3 [2.4]         | 9.1 [1.7]          | 9.8 [2.1]          | 8.4 [1.8]         | 9.0 [2.2]          | 8.2 [1.3]          | 8.5 [1.7]          | 8.0 [1.0]        | 7.7 [1.2]          | 8.8 [1.7]           | 8.7 [2.0]           |
| A1c* mmol/mol              | 76.0 [21.9]        | 89.1 [26.2]        | 76.0 [18.6]        | 83.6 [23.0]        | 68.3 [19.7]       | 74.9 [24.0]        | 66.1 [14.2]        | 69.4 [18.6]        | 63.9 [10.9]      | 60.7 [13.1]        | 72.7 [18.6]         | 71.6 [21.9]         |
| A1C† %                     | 9.1 {1.0}          | 10.3 {1.1}         | 9.1 {0.8}          | 9.8 {0.9}          | 8.4 {1.0}         | 9.0 {1.0}          | 8.2 {0.7}          | 8.5 {0.8}          | 8.0 {0.5}        | 7.7 {0.6}          | 8.8 {0.8}           | 8.7 {0.8}           |
| A1C† mmol/mol              | 76.0 {10.9}        | 89.1 {12.0}        | 76.0 {8.7}         | 83.6 {8.7}         | 68.3 {10.9}       | 74.9 {10.9}        | 66.1 {7.7}         | 69.4 {8.7}         | 63.9 {5.5}       | 60.7 {6.6}         | 72.7 {8.7}          | 71.6 {8.7}          |
| Male                       | 212 (50.8)         | 103 (50.5)         | 231 (48.7)         | 105 (52.8)         | 51 (56.0)         | 92 (55.8)          | 266 (56.5)         | 227 (53.8)         | 2 (66.7)         | 235 (50.4)         | 762 (52.3)          | ---                 |
| Race/ethnicity             |                    |                    |                    |                    |                   |                    |                    |                    |                  |                    |                     |                     |
| Hispanic                   | 125 (30.0)         | 67 (32.8)          | 83 (17.5)          | 33 (16.6)          | 16 (17.6)         | 45 (27.3)          | 27 (5.7)           | 57 (13.5)          | 0 (0)            | 49 (10.5)          | 251 (17.2)          | ---                 |
| NH White                   | 214 (51.3)         | 96 (47.1)          | 323 (68.1)         | 138 (69.3)         | 63 (69.2)         | 96 (58.2)          | 381 (80.9)         | 304 (72.0)         | 3 (100)          | 350 (75.1)         | 984 (67.6)          | ---                 |
| NH Black                   | 29 (7)             | 21 (10.3)          | 12 (2.5)           | 6 (3.0)            | 3 (3.3)           | 7 (4.2)            | 8 (1.7)            | 12 (2.8)           | 0 (0)            | 6 (1.3)            | 52 (3.6)            | ---                 |
| Other                      | 47 (11.3)          | 20 (9.8)           | 56 (11.8)          | 22 (11.0)          | 9 (9.9)           | 17 (10.3)          | 55 (11.6)          | 49 (11.6)          | 0 (0)            | 61 (13.0)          | 169 (11.6)          | ---                 |
| Insurance                  |                    |                    |                    |                    |                   |                    |                    |                    |                  |                    |                     |                     |
| Private                    | 177 (42.4)         | 74 (36.3)          | 326 (68.8)         | 125 (62.8)         | 64 (70.3)         | 85 (51.5)          | 356 (75.6)         | 304 (72.0)         | 3 (100)          | 353 (75.8)         | 926 (63.6)          | 941 (64.6)          |
| Medicaid                   | 216 (51.8)         | 119 (58.3)         | 130 (27.4)         | 62 (31.2)          | 23 (25.3)         | 76 (46.1)          | 93 (19.7)          | 104 (24.6)         | 0 (0)            | 95 (20.4)          | 462 (31.7)          | 456 (31.3)          |
| Military Plans             | 16 (3.8)           | 7 (3.4)            | 15 (3.2)           | 10 (5.0)           | 4 (4.4)           | 4 (2.4)            | 17 (3.6)           | 14 (3.3)           | 0 (0)            | 16 (3.4)           | 52 (3.6)            | 51 (3.5)            |
| Other/None                 | 8 (1.9)            | 4 (2.0)            | 3 (0.6)            | 2 (1.0)            | 0 (0)             | 0 (0)              | 5 (1.1)            | 0 (0)              | 0 (0)            | 2 (0.4)            | 16 (1.1)            | 8 (0.5)             |
| Diabetes duration in years | 4.4 [3.8]          | 9.0 [3.9]          | 6.3 [3.7]          | 10.2 [4.1]         | 3.4 [2.9]         | 9.1 [3.6]          | 4.8 [3.6]          | 9.0 [3.8]          | 6.3 [0.84]       | 8.7 [3.6]          | 5.1 [3.8]           | 9.1 [3.8]           |
| CGM TIR                    | ---                | ---                | ---                | ---                | 41.9 [21.9]       | 39.3 [19.9]        | 44.4 [18.4]        | 42.3 [17.6]        | 37.0 [5.0]       | 58.5 [16.4]        | 43.9 [19.1]         | 49.2 [19.4]         |
| CGM TIR missing            | ---                | ---                | ---                | ---                | 21 (23.1)         | 16 (9.7)           | 209 (44.3)         | 27 (6.4)           | 1 (33.3)         | 15 (3.2)           | 231 (40.9)          | 58 (5.5)            |

\*Arithmetic mean

†Least squares mean

Abbreviations: SD, standard deviation; SE, standard error; MDI, multiple daily injections; BGM, blood glucose meter; CGM, continuous glucose monitor; HCL, hybrid closed loop; NH, non-Hispanic; TIR, time in range 70-180 mg/dL (3.9-10 mmol/L)
