# Supplementary material
Source: publisher figshare collection journal article supplement (https://diabetesjournals.figshare.com/articles/dataset/_/22289512)

**Supplemental Figure 2.** A1C by technology group, adjusted for age, diabetes duration, gender, insurance, and race/ethnicity; patients who changed technology group; only comparisons with  $p < 0.05$  are shown. P values are indicated by \*  $< 0.05$ , \*\*  $< 0.01$ , \*\*\*  $< 0.001$ , \*\*\*\*  $< 0.0001$ . Error bars represent 95% confidence intervals.

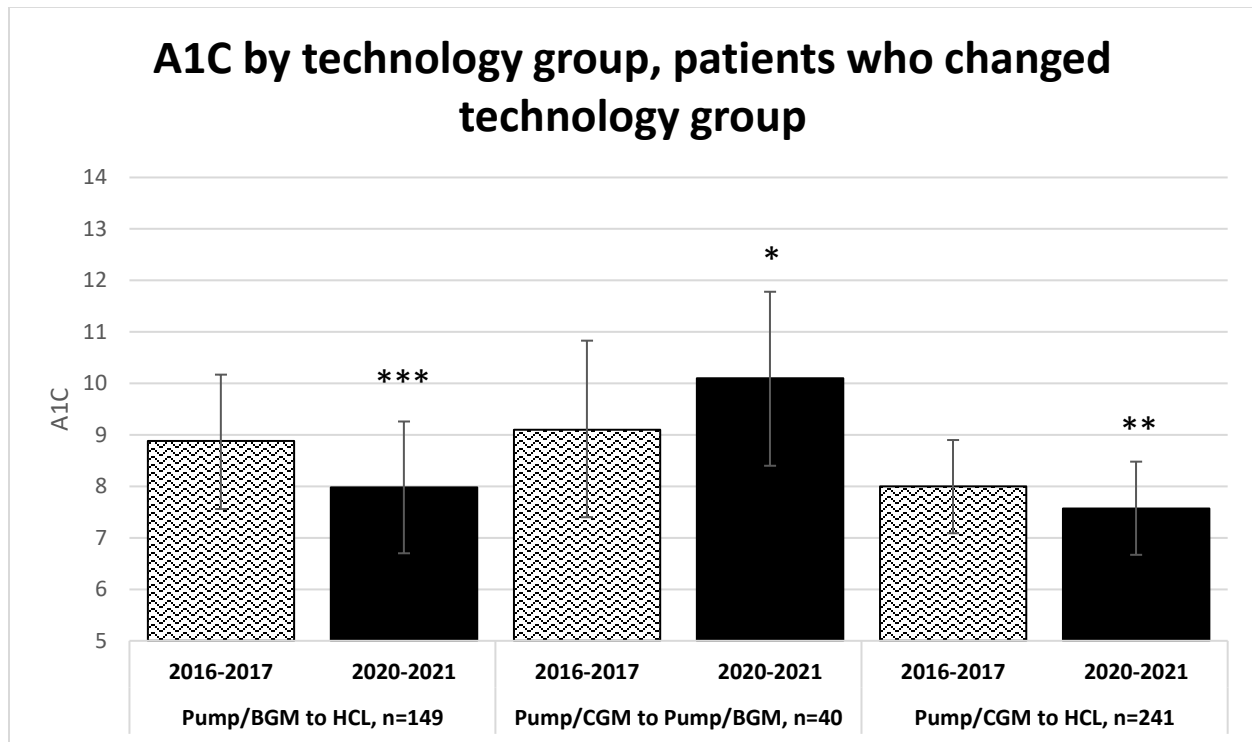

Supplement: Supplementary file 3 [file 1]
